# Supplementary material
Source: PubMed Central journal article supplement (PMC7960234)
Supplement: 16-00676.pdf [file 16-00676.pdf]

**On-line Table: Comparisons between DTI parameters within ROIs in children born from PE-FIs and children born from typical healthy control pregnancies<sup>a</sup>**

| DTI Parameters Analyzed in Tractography                        | Brain ROIs Identified by Voxel-Based Analysis |             |         |                           |                           |                   |              |              |         |              |              |         |                                  |                            |                  |                          |                          |                  |
|----------------------------------------------------------------|-----------------------------------------------|-------------|---------|---------------------------|---------------------------|-------------------|--------------|--------------|---------|--------------|--------------|---------|----------------------------------|----------------------------|------------------|--------------------------|--------------------------|------------------|
|                                                                | Middle Occipital Gyrus                        |             |         | Caudate Nucleus           |                           |                   | Precuneus    |              |         | Cerebellum   |              |         | Superior Longitudinal Fasciculus |                            |                  | Cingulate Gyrus          |                          |                  |
|                                                                | Controls                                      | PE-FI       | P Value | Controls                  | PE-FI                     | P Value           | Controls     | PE-FI        | P Value | Controls     | PE-FI        | P Value | Controls                         | PE-FI                      | P Value          | Controls                 | PE-FI                    | P Value          |
| FA                                                             | 0.27 ± 0.01                                   | 0.28 ± 0.01 | .47     | 0.39 ± 0.02 <sup>b</sup>  | 0.47 ± 0.02 <sup>b</sup>  | .008 <sup>b</sup> | 0.43 ± 0.02  | 0.44 ± 0.01  | .34     | 0.47 ± 0.02  | 0.45 ± 0.01  | .77     | 0.41 ± 0.008                     | 0.42 ± 0.006               | .20              | 0.39 ± 0.01              | 0.44 ± 0.02              | .07              |
| MD ( $\times 10^{-3}$ mm <sup>2</sup> /s)                      | 0.80 ± 0.02                                   | 0.85 ± 0.08 | .29     | 0.85 ± 0.03               | 0.83 ± 0.03               | .65               | 0.78 ± 0.01  | 0.81 ± 0.01  | .12     | 0.85 ± 0.06  | 0.83 ± 0.05  | .60     | 0.79 ± 0.08                      | 0.78 ± 0.06                | .85              | 0.85 ± 0.02              | 0.88 ± 0.02              | .25              |
| Tract volumes (in voxels)                                      | 34.5 ± 8.7                                    | 49.5 ± 21.9 | .26     | 194.8 ± 45.1 <sup>b</sup> | 292.6 ± 34.8 <sup>b</sup> | .05 <sup>b</sup>  | 182.8 ± 55.3 | 198.7 ± 27.7 | .39     | 208.2 ± 39.3 | 175.0 ± 20.4 | .76     | 834.9 ± 116.8 <sup>b</sup>       | 1085.9 ± 58.6 <sup>b</sup> | .03 <sup>b</sup> | 122.8 ± 35.5             | 224.6 ± 58.9             | .07              |
| Parallel diffusion ( $\times 10^{-3}$ mm <sup>2</sup> /s)      | 1.04 ± 0.03                                   | 1.10 ± 0.09 | .29     | 1.23 ± 0.06               | 1.31 ± 0.06               | .17               | 1.17 ± 0.03  | 1.21 ± 0.02  | .12     | 1.34 ± 0.09  | 1.27 ± 0.07  | .71     | 1.17 ± 0.01                      | 1.15 ± 0.01                | .75              | 1.23 ± 0.03 <sup>b</sup> | 1.33 ± 0.04 <sup>b</sup> | .04 <sup>b</sup> |
| Perpendicular diffusion ( $\times 10^{-3}$ mm <sup>2</sup> /s) | 0.97 ± 0.02                                   | 1.02 ± 0.09 | .30     | 0.94 ± 0.03               | 0.85 ± 0.04               | .97               | 0.86 ± 0.03  | 0.87 ± 0.02  | .48     | 0.88 ± 0.07  | 0.89 ± 0.06  | .47     | 0.88 ± 0.02                      | 0.86 ± 0.08                | .78              | 0.95 ± 0.03              | 0.92 ± 0.03              | .73              |

<sup>a</sup> Values are expressed as mean ± standard error of the mean. P = 1-way ANCOVA (corrected by age).

<sup>b</sup> Significant differences between groups were found.
